# Supplementary material for: High Resolution of Water Availability for Emilia-Romagna Region over 1961–2015
Source: Hindawi journal article supplement (doi:10.1155/2018/2489758), 2018-11-14
Supplement: f1 [file 2489758.f1.zip]

Archive with 6 entries (6 files):
- Supplementary material 1.png
- Supplementary material 2.  Emilia-Romagna stations.xlsx
- Supplementary material 3. Emilia  monthly TT 1961-1990.png
- Supplementary material 4. Emilia  monthly TT 1991-2015.png
- Supplementary material 5. Emilia  monthly ET0 1961-1990.png
- Supplementary material 6. Emilia  monthly ET0 1991-2015.png
