# Supplementary material for: High Resolution of Water Availability for Emilia-Romagna Region over 1961–2015
Source: Hindawi journal article supplement (doi:10.1155/2018/2489758), 2018-11-14
Supplement: f1 [file 2489758.f1.zip › Supplementary material 2. Emilia-Romagna stations.xlsx]

## Sheet: Celle
Code	Name	Row	Col	Height	Lon	Lat
57	PASSO DEL GIOVA'	23	1	1311.23	9.19657	44.6775
58	CARTASEGNA	22	1	1165.26	9.19657	44.6325
1918	MONTE DELLA ZUCCA	2	47	915.44	12.0969	43.7325
1958	SAN PATRIGNANO	2	48	781.15	12.1599	43.7325
1797	BADIA PRATAGLIA	3	44	979.62	11.9077	43.7775
1878	VALSAVIGNONE	2	46	816.26	12.0338	43.7325
1716	POGGIO SCALI	4	42	1181.85	11.7816	43.8225
1998	POGGIO DELLE CAMPANE	2	49	575.14	12.223	43.7325
1675	MONTE FALTERONA	5	41	1210.56	11.7186	43.8675
1340	ANZOLA	20	33	37.86	11.2142	44.5425
1339	LAVINO DI SOTTO	21	33	25.91	11.2142	44.5875
1418	ARGELATO	22	35	18.84	11.3403	44.6325
1577	MONDONUOVO	23	39	4.95	11.5925	44.6775
1261	BAZZANO	19	31	103.58	11.0881	44.4975
1497	ALTEDO	23	37	7.85	11.4664	44.6775
1458	BENTIVOGLIO	22	36	14.44	11.4033	44.6325
1459	BOLOGNA INTERPORTO	21	36	20.16	11.4033	44.5875
1421	BOLOGNA	19	35	68.14	11.3403	44.4975
1380	BOLOGNA AEROPORTO	20	34	32.76	11.2772	44.5425
1381	CASALECCHIO	19	34	66.21	11.2772	44.4975
1420	CORTICELLA	20	35	30.07	11.3403	44.5425
1422	RASTIGNANO	18	35	184.79	11.3403	44.4525
1461	VILLANOVA DI CASTENASO	19	36	47.44	11.4033	44.4975
1586	BORGO TOSSIGNANO	14	39	199.54	11.5925	44.2725
1578	BARICELLA EST	22	39	5.38	11.5925	44.6325
1540	BUDRIO	20	38	21.22	11.5294	44.5425
1541	PRUNARO	19	38	26.42	11.5294	44.4975
1499	S.BRIGIDA	21	37	15.66	11.4664	44.5875
1539	S.GIOVANNI IN TRIARIO	21	38	10.55	11.5294	44.5875
1580	VEDRANA	20	39	12.51	11.5925	44.5425
1379	LONGARA	21	34	20.64	11.2772	44.5875
1268	CAMUGNANO NORD	12	31	614.05	11.0881	44.1825
1269	CAMUGNANO SUD	11	31	748.56	11.0881	44.1375
1270	SUVIANA	10	31	1036.27	11.0881	44.0925
1308	TRASERRA	12	32	613.24	11.1511	44.1825
1382	BORGONUOVO DI PONTECCHIO	18	34	140.96	11.2772	44.4525
1547	CASTEL DEL RIO NORD	13	38	340.27	11.5294	44.2275
1506	SASSOLEONE	14	37	406.37	11.4664	44.2725
1545	TOMBE SASSATELLO	15	38	233.72	11.5294	44.3175
1226	CASTEL D'AIANO	14	30	704.23	11.025	44.2725
1548	CASTEL DEL RIO SUD	12	38	543.07	11.5294	44.1825
1507	GIUGNOLA	13	37	450.59	11.4664	44.2275
1228	CASTEL DI CASIO NORD	12	30	511.24	11.025	44.1825
1229	CASTEL DI CASIO SUD	11	30	541.82	11.025	44.1375
1622	MEDICINA SUD	18	40	27.6	11.6555	44.4525
1419	CASTELMAGGIORE	21	35	22.81	11.3403	44.5875
1583	CASTEL S.PIETRO	17	39	64.85	11.5925	44.4075
1544	FRASSINETO	16	38	223.67	11.5294	44.3625
1582	GAIANA	18	39	35.52	11.5925	44.4525
1504	MONTE CALDERARO	16	37	347.73	11.4664	44.3625
1543	OSTERIA GRANDE	17	38	112.68	11.5294	44.4075
1584	S.MARTINO IN PEDRIOLO	16	39	149.29	11.5925	44.3625
1377	CASTELLO D'ARGILE	23	34	18.08	11.2772	44.6775
1417	VENEZZANO	23	35	14.19	11.3403	44.6775
1222	CASTELLO DI SERRAVALLE	18	30	217.1	11.025	44.4525
1263	SAVIGNO	17	31	299.21	11.0881	44.4075
1501	CASTENASO	19	37	39.68	11.4664	44.4975
1309	CASTIGLIONE DEI PEPOLI	11	32	787.37	11.1511	44.1375
1300	CALCARA	20	32	45.34	11.1511	44.5425
1295	BOLOGNINA	25	32	15.37	11.1511	44.7675
1296	CREVALCORE	24	32	15.35	11.1511	44.7225
1335	PALATA SUD	25	33	12.29	11.2142	44.7675
1623	CASOLA CANINA OVEST	17	40	44.07	11.6555	44.4075
1624	DOZZA	16	40	103.38	11.6555	44.3625
1546	FONTANELICE	14	38	310.05	11.5294	44.2725
1187	ABETAIA	13	29	820.49	10.962	44.2275
1227	RIOLA DI VERGATO	13	30	469.49	11.025	44.2275
1455	BOSCO PANFILIA	25	36	12.04	11.4033	44.7675
1150	ORSIGNA	10	28	1053.61	10.8989	44.0925
1189	PORRETTA TERME	11	29	676.45	10.962	44.1375
1460	CADRIANO	20	36	29.34	11.4033	44.5425
1500	GRANAROLO	20	37	26.84	11.4664	44.5425
1267	CAMPOLO	13	31	466.66	11.0881	44.2275
1306	GRIZZANA MORANDI	14	32	456.96	11.1511	44.2725
1307	MONTEACUTO RAGAZZA	13	32	486.17	11.1511	44.2275
1585	CASALFIUMANESE	15	39	199.27	11.5925	44.3175
1663	GIARDINO	17	41	26.7	11.7186	44.4075
1664	IMOLA	16	41	41.63	11.7186	44.3625
1704	IMOLA CASELLO	16	42	27.37	11.7816	44.3625
1665	IMOLA SUD	15	41	116.32	11.7186	44.3175
1702	MASSALOMBARDA OVEST	18	42	8.86	11.7816	44.4525
1625	PONTICELLI	15	40	111.8	11.6555	44.3175
1700	PORTONOVO	20	42	4.34	11.7816	44.5425
1662	SESTO IMOLESE	18	41	18.43	11.7186	44.4525
1108	CHIESINA	12	27	943.73	10.8359	44.1825
1109	MADONNA DELL'ACERO	11	27	1351.65	10.8359	44.1375
1148	QUERCIOLA	12	28	700.72	10.8989	44.1825
1426	SABBIONI	14	35	567.15	11.3403	44.2725
1536	MALALBERGO	24	38	6.78	11.5294	44.7225
1498	MINERBIO	22	37	10.37	11.4664	44.6325
1537	PEGOLA	23	38	6.72	11.5294	44.6775
1344	MARZABOTTO NORD	16	33	273.44	11.2142	44.3625
1345	MARZABOTTO SUD	15	33	332.11	11.2142	44.3175
1661	BUDA	19	41	8.21	11.7186	44.4975
1621	GANZANIGO	19	40	13.47	11.6555	44.4975
1660	S.ANTONIO SUD	20	41	5.01	11.7186	44.5425
1620	SELVA MALVEZZI	20	40	6.98	11.6555	44.5425
1581	VILLA FONTANA	19	39	19.74	11.5925	44.4975
1538	BARICELLA	22	38	6.73	11.5294	44.6325
1699	FERRARA	21	42	3.68	11.7816	44.5875
1658	MARMORTA	22	41	3.76	11.7186	44.6325
1579	MEZZOLARA	21	39	10.05	11.5925	44.5875
1618	MOLINELLA	22	40	5.72	11.6555	44.6325
1619	MOLINELLA SUD	21	40	6.42	11.6555	44.5875
1659	S.ANTONIO NORD	21	41	4.61	11.7186	44.5875
1698	SAIARINO	22	42	3.48	11.7816	44.6325
1427	MONGHIDORO	13	35	646.89	11.3403	44.2275
1301	CRESPELLANO	19	32	107.61	11.1511	44.4975
1304	MEDELANA	16	32	527.62	11.1511	44.3625
1303	MONTE S.GIOVANNI	17	32	307.55	11.1511	44.4075
1302	MONTE S.PIETRO	18	32	231.13	11.1511	44.4525
1466	MONTE BIBELE	14	36	442.51	11.4033	44.2725
1465	MONTERENZIO	15	36	375.36	11.4033	44.3175
1467	PIANCALDOLI	13	36	618.49	11.4033	44.2275
1505	S.CLEMENTE	15	37	297.93	11.4664	44.3175
1262	MONTEVEGLIO	18	31	188.93	11.0881	44.4525
1386	MONZUNO	14	34	548.77	11.2772	44.2725
1346	RIOVEGGIO	14	33	384.23	11.2142	44.2725
1385	VADO	15	34	334.93	11.2772	44.3175
1703	BUBANO	17	42	16.74	11.7816	44.4075
1503	CASTEL DEI BRITTI	17	37	193	11.4664	44.4075
1502	OZZANO	18	37	59.5	11.4664	44.4525
1542	PONTE RIZZOLI	18	38	42.52	11.5294	44.4525
1464	CA' DI BAZZONI	16	36	258.21	11.4033	44.3625
1425	LIVERGNANO	15	35	409.06	11.3403	44.3175
1463	MONTE CALVO	17	36	181.13	11.4033	44.4075
1423	PIAN DI MACINA	17	35	207.36	11.3403	44.4075
1424	PIANORO	16	35	270.81	11.3403	44.3625
1188	GAGGIO MONTANO	12	29	484.37	10.962	44.1825
1149	LIZZANO IN BELEVEDERE	11	28	960.37	10.8989	44.1375
1378	SALA BOLOGNESE	22	34	19.16	11.2772	44.6325
1388	MADONNA DEI FORNELLI	12	34	884.08	11.2772	44.1825
1348	MONTEFREDENTE	12	33	639.42	11.2142	44.1825
1387	S.BENEDETTO VAL DI SAMBRO EST	13	34	703.12	11.2772	44.2275
1347	S.BENEDETTO VAL DI SAMBRO OVEST	13	33	541.37	11.2142	44.2275
1336	DECIMA	24	33	12.6	11.2142	44.7225
1337	DECIMA SUD	23	33	13.7	11.2142	44.6775
1338	S.GIOVANNI IN PERSICETO	22	33	18.64	11.2142	44.6325
1298	TIVOLI	22	32	22.11	11.1511	44.6325
1462	S.LAZZARO	18	36	110.73	11.4033	44.4525
1416	PIEVE DI CENTO	24	35	11.11	11.3403	44.7225
1456	S.PIETRO IN CASALE NORD	24	36	10.99	11.4033	44.7225
1457	S.PIETRO IN CASALE SUD	23	36	12.37	11.4033	44.6775
1496	S.VINCENZO	24	37	7.57	11.4664	44.7225
1297	S.AGATA BOLOGNESE	23	32	15.5	11.1511	44.6775
1384	BADOLO	16	34	291.13	11.2772	44.3625
1342	CALDERINO	18	33	230	11.2142	44.4525
1383	SASSO MARCONI EST	17	34	165.77	11.2772	44.4075
1343	SASSO MARCONI OVEST	17	33	311.13	11.2142	44.4075
1264	MONTEPASTORE	16	31	531.76	11.0881	44.3625
1224	ZOCCA NORD EST	16	30	593.08	11.025	44.3625
1265	CEREGLIO	15	31	588.55	11.0881	44.3175
1305	SIBANO	15	32	355.84	11.1511	44.3175
1266	VERGATO	14	31	365.42	11.0881	44.2725
1341	ZOLA PREDOSA	19	33	77.66	11.2142	44.4975
851	CASABELLOTTO	29	21	24.07	10.4576	44.9475
810	CASALMAGGIORE	30	20	26.66	10.3945	44.9925
567	CREMONA	33	14	34.42	10.0162	45.1275
770	GUSSOLA	30	19	26.6	10.3315	44.9925
649	ZIBELLO	31	16	28.7	10.1423	45.0375
689	SAN DANIELE PO	31	17	27.56	10.2054	45.0375
527	OLZA	33	13	34.59	9.95317	45.1275
608	STAGNO LOMBARDO	32	15	27	10.0793	45.0825
729	MOTTA BALUFFI	31	18	27.44	10.2684	45.0375
1738	ARGENTA NORD	22	43	-0.98	11.8447	44.6325
1739	ARGENTA SUD	21	43	2.31	11.8447	44.5875
1778	BANDO	22	44	-3	11.9077	44.6325
1818	BONIFICA DEL MANTELLO	22	45	-3.63	11.9708	44.6325
1779	FILO	21	44	-0.83	11.9077	44.5875
1859	LONGASTRINO	21	46	-1.98	12.0338	44.5875
1657	OSPITAL MONACALE	23	41	0.16	11.7186	44.6775
1617	S.MARIA CODIFIUME	23	40	4.16	11.6555	44.6775
1899	VALLE FOSSA DI PORTO SUD	21	47	-2.99	12.0969	44.5875
1858	VALLI MEZZANO SUD	22	46	-4.2	12.0338	44.6325
1891	ARIANO FERRARESE	29	47	-3.3	12.0969	44.9475
1851	PONTE ALBERSANO	29	46	-4.52	12.0338	44.9475
1452	BONDENO	28	36	7.63	11.4033	44.9025
1412	BURANA	28	35	5.54	11.3403	44.9025
1411	BURANA NORD	29	35	5.78	11.3403	44.9475
1372	REDENA	28	34	6.12	11.2772	44.9025
1453	S.BIANCA	27	36	7.36	11.4033	44.8575
1492	SALVATONICA	28	37	5.19	11.4664	44.9025
1451	STELLATA	29	36	6.64	11.4033	44.9475
1376	CENTO	24	34	15.04	11.2772	44.7225
1414	PILASTRELLO	26	35	9.41	11.3403	44.8125
1375	RENAZZO	25	34	13.55	11.2772	44.7675
1934	ABBAZIA DI POMPOSA	26	48	-2.75	12.1599	44.8125
1974	ABBAZIA DI POMPOSA EST	26	49	-2.61	12.223	44.8125
1933	CAPRILE	27	48	-2.67	12.1599	44.8575
1893	CODIGORO NORD	27	47	-4.1	12.0969	44.8575
1973	GIGLIOLA	27	49	-0.87	12.223	44.8575
1853	IOLANDA EST	27	46	-4.99	12.0338	44.8575
1932	ITALBA	28	48	-3.1	12.1599	44.9025
2014	LIDO DI VOLANO	26	50	2	12.286	44.8125
1892	MEZZOGORO	28	47	-4.42	12.0969	44.9025
2015	BORGO MANARA	25	50	4.47	12.286	44.7675
1937	COMACCHIO	23	48	-2.49	12.1599	44.6775
2017	LIDO DEGLI ESTENSI	23	50	0	12.286	44.6775
1976	LIDO DI POMPOSA	24	49	-0.54	12.223	44.7225
1977	PORTO GARIBALDI	23	49	-0.64	12.223	44.6775
1975	VALLE BERTUZZI	25	49	-2.31	12.223	44.7675
1978	VALLE CAMPO	22	49	-1.34	12.223	44.6325
1898	VALLE FOSSA DI PORTO NORD	22	47	-3.77	12.0969	44.6325
1938	VALLE MAGNIAVACCA NORD-OVEST	22	48	-2.8	12.1599	44.6325
1939	VALLE MAGNIAVACCA SUD-OVEST	21	48	-2.85	12.1599	44.5875
1936	VOLANIA	24	48	-3.29	12.1599	44.7225
1896	VOLANIA OVEST	24	47	-3.2	12.0969	44.7225
1772	AMBROGIO	28	44	-1.84	11.9077	44.9025
1811	BERRA SUD	29	45	-3.28	11.9708	44.9475
1692	CA' MATTE	28	42	0.97	11.7816	44.9025
1771	CARMIGNANO	29	44	-1.5	11.9077	44.9475
1732	COPPARO	28	43	0.25	11.8447	44.9025
1693	FOSSALTA	27	42	1.31	11.7816	44.8575
1653	BAURA	27	41	2.05	11.7186	44.8575
1532	CASALGLIA	28	38	4.4	11.5294	44.9025
1574	CHIESUOL DEL FOSSO	26	39	7.07	11.5925	44.8125
1654	CONA	26	41	2.4	11.7186	44.8125
1734	DENORE	26	43	-0.56	11.8447	44.8125
1613	FERRARA NORD-EST	27	40	2.67	11.6555	44.8575
1573	FERRARA OVEST	27	39	5.68	11.5925	44.8575
1614	FERRARA SUD-EST	26	40	3.73	11.6555	44.8125
1652	FOSSADALBERO	28	41	1.5	11.7186	44.9025
1615	GAIBANELLO	25	40	3.13	11.6555	44.7675
1694	MASI TORELLO	26	42	0.78	11.7816	44.8125
1575	MONTALBANO	25	39	6.6	11.5925	44.7675
1612	PARROCCHIA FRANCOLINO	28	40	2.82	11.6555	44.9025
1576	PASSO SEGNI	24	39	6.27	11.5925	44.7225
1533	POROTTO	27	38	6.93	11.5294	44.8575
1616	S.BARTOLOMEO IN BOSCO	24	40	4.01	11.6555	44.7225
1733	FORMIGNANA	27	43	-0.23	11.8447	44.8575
2095	BOCCA DEL PO' DI GORO	25	52	0.28	12.4121	44.7675
2055	FARO DEL BACUCCO	25	51	0	12.3491	44.7675
2054	GORINO	26	51	-0.43	12.3491	44.8125
2013	GORO	27	50	-0.55	12.286	44.8575
1852	BARCHESSA	28	46	-5.19	12.0338	44.9025
1773	BRAZZOLO	27	44	-3.62	11.9077	44.8575
1813	GHERARDI	27	45	-4.9	11.9708	44.8575
1812	IOLANDA NORD	28	45	-4.37	11.9708	44.9025
1935	LAGOSANTO	25	48	-2.55	12.1599	44.7675
1695	MASI S.GIACOMO	25	42	-0.42	11.7816	44.7675
1894	CODIGORO	26	47	-3.6	12.0969	44.8125
1855	CORTE CENTRALE NORD	25	46	-3.61	12.0338	44.7675
1895	LAGOSANTO OVEST	25	47	-4.44	12.0969	44.7675
1854	MASSAFISCAGLIA	26	46	-3.17	12.0338	44.8125
1972	MESOLA	28	49	-2.54	12.223	44.9025
1814	MIGLIARO	26	45	-2.68	11.9708	44.8125
1815	OSTELLATO NORD-EST	25	45	-1.82	11.9708	44.7675
1494	MIRABELLO	26	37	9.12	11.4664	44.8125
1817	BONIFICA DEL MANTELLO NORD	23	45	-4.53	11.9708	44.6775
1856	CORTE CENTRALE SUD	24	46	-3.61	12.0338	44.7225
1775	MIGLIARINO	25	44	-1.16	11.9077	44.7675
1816	OSTELLATO SUD-EST	24	45	-3.77	11.9708	44.7225
1776	OSTELLATO SUD-OVEST	24	44	-2.23	11.9077	44.7225
1735	ROVERETO	25	43	-0.75	11.8447	44.7675
1897	SPINA EST	23	47	-3.61	12.0969	44.6775
1857	VALLI MEZZANO	23	46	-5.17	12.0338	44.6775
1495	POGGIO RENATICO	25	37	8.58	11.4664	44.7675
1535	POGGIO RENATICO EST	25	38	5.76	11.5294	44.7675
1777	BANDO NORD	23	44	-2.89	11.9077	44.6775
1736	MAIERO	24	43	-1.74	11.8447	44.7225
1696	PORTOMAGGIORE NORD-OVEST	24	42	0.22	11.7816	44.7225
1697	PORTOMAGGIORE SUD-OVEST	23	42	-0.18	11.7816	44.6775
1737	PORTOVERRARA	23	43	-1.71	11.8447	44.6775
1731	ALBERONE	29	43	-0.85	11.8447	44.9475
1691	RO	29	42	1.26	11.7816	44.9475
1415	DOSSO	25	35	11.42	11.3403	44.7675
1454	S.CARLO	26	36	9.68	11.4033	44.8125
1774	TRESIGALLO	26	44	-1.15	11.9077	44.8125
1534	CORONELLA	26	38	9.12	11.5294	44.8125
1493	PONTE DEI RODONI	27	37	7.28	11.4664	44.8575
1655	GUALDO	25	41	0.95	11.7186	44.7675
1656	MONTESANTO	24	41	0.71	11.7186	44.7225
1350	RONCOBILACCIO	10	33	816.78	11.2142	44.0925
1349	BARAGAZZA	11	33	670.54	11.2142	44.1375
1389	COVIGLIAIO	11	34	889.08	11.2772	44.1375
1508	MONTE LA FINE	12	37	550.16	11.4664	44.1825
1390	PASSO DELLA FUTA	10	34	782.33	11.2772	44.0925
1428	PASSO DELLA RATICOSA	12	35	925.22	11.3403	44.1825
1468	SASSO DI SAN ZANOBI	12	36	876.6	11.4033	44.1825
1590	MARRADI	10	39	727.64	11.5925	44.0925
1631	PONTE DELLA VALLE	9	40	919	11.6555	44.0475
1630	POPOLANO	10	40	353.5	11.6555	44.0925
1670	TREDOZIO	10	41	451.9	11.7186	44.0925
1549	BIBBIANA	11	38	690.48	11.5294	44.1375
1589	FONTANA MONETA	11	39	641.98	11.5925	44.1375
1633	CAMPAGNA	7	40	754.79	11.6555	43.9575
1836	BAGNO DI ROMAGNA	4	45	717.28	11.9708	43.8225
1756	LA LAMA	4	43	978.44	11.8447	43.8225
1874	MONTE MASCOLINO	6	46	656.59	12.0338	43.9125
1875	PASSO DELL'INCISA	5	46	657.95	12.0338	43.8675
1796	PIETRAPAZZA	4	44	876.97	11.9077	43.8225
1794	POGGIO ALLA LASTRA	6	44	521.88	11.9077	43.9125
1755	RIDRACOLI	5	43	739.39	11.8447	43.8675
1835	S.PIERO IN BAGNO	5	45	612.08	11.9708	43.8675
1795	STRABATENZA	5	44	715.71	11.9077	43.8675
1949	BERTINORO	11	48	117.37	12.1599	44.1375
1909	FRATTA TERME	11	47	89.57	12.0969	44.1375
2072	SAN GIOVANNI IN GALILEA	8	51	204.09	12.3491	44.0025
1788	MONTEFORTINO	12	44	184.57	11.9077	44.1825
1951	BORELLO	9	48	180.83	12.1599	44.0475
2069	BULGARNO'	11	51	15.16	12.3491	44.1375
2030	CALISESE	10	50	101.38	12.286	44.0925
1989	CESENA	11	49	42.98	12.223	44.1375
2029	CESENA EST	11	50	30.82	12.286	44.1375
1988	MARTORANO	12	49	22.71	12.223	44.1825
1990	MONTEREALE	10	49	135.88	12.223	44.0925
2027	PISIGNANO	13	50	4.12	12.286	44.2275
1950	POLENTA	10	48	193.58	12.1599	44.0925
2028	S.GIORGIO	12	50	12.81	12.286	44.1825
1991	SORRIVOLI	9	49	240.19	12.223	44.0475
2108	CESENATICO	12	52	0.78	12.4121	44.1825
2068	VILLALTA	12	51	4.45	12.3491	44.1825
2107	ZADINA PINETA	13	52	1.47	12.4121	44.2275
1832	CIVITELLA DI ROMAGNA	8	45	417.88	11.9708	44.0025
1873	CIVORIO	7	46	534.82	12.0338	43.9575
1871	CUSERCOLI	9	46	251.95	12.0338	44.0475
1831	NESPOLI	9	45	329.96	11.9708	44.0475
1913	RULLATO	7	47	456.3	12.0969	43.9575
1872	VOLTRE	8	46	436.32	12.0338	44.0025
1789	TERRA DEL SOLE	11	44	205.62	11.9077	44.1375
1907	CARPINELLO	13	47	18.67	12.0969	44.2275
1947	CARPINELLO EST	13	48	14.63	12.1599	44.2275
1828	CASTROCARO TERME	12	45	98.69	11.9708	44.1825
1867	FORLI'	13	46	26.08	12.0338	44.2275
1906	FORLI' CASELLO	14	47	11.88	12.0969	44.2725
1868	S.MARTINO IN STRADA	12	46	48.23	12.0338	44.1825
1866	SAN MARTINO VILLAFRANCA	14	46	15.73	12.0338	44.2725
1865	VILLAFRANCA DI FORLI' NORD	15	46	9.99	12.0338	44.3175
1827	VILLAGRAPPA	13	45	42.62	11.9708	44.2275
1948	CAPOCOLLE	12	48	25.15	12.1599	44.1825
1908	SELBAGNONE	12	47	28.86	12.0969	44.1825
1833	BUGGIANA	7	45	633.48	11.9708	43.9575
1792	GALEATA	8	44	368.02	11.9077	44.0025
2070	LONGIANO	10	51	50.96	12.3491	44.0925
1911	OSTERIA DI PIAVOLA	9	47	260.06	12.0969	44.0475
1870	S.COLOMBANO	10	46	185.86	12.0338	44.0925
1910	TEODORANO	10	47	185.9	12.0969	44.0925
1869	VITIGNANO	11	46	143.07	12.0338	44.1375
1912	LINARO	8	47	297.49	12.0969	44.0025
1952	MONTE IOTTONE	8	48	244.42	12.1599	44.0025
1749	DOVADOLA EST	11	43	405.74	11.8447	44.1375
1709	MODIGLIANA SUD	11	42	349.46	11.7816	44.1375
1748	PIETRAMORA	12	43	257.68	11.8447	44.1825
1632	CASCATA DELL'ACQUACHETA	8	40	815.51	11.6555	44.0025
1711	PORTICO DI ROMAGNA	9	42	498.61	11.7816	44.0475
1672	S.BENEDETTO IN ALPE	8	41	705.55	11.7186	44.0025
1791	COLLE DI CENTOFORCHE	9	44	430.33	11.9077	44.0475
1829	FIUMANA	11	45	189.48	11.9708	44.1375
1830	PREDAPPIO	10	45	273.09	11.9708	44.0925
1674	ALPE DI S.BENEDETTO	6	41	924	11.7186	43.9125
1753	CAMPOSONALDO	7	43	662.36	11.8447	43.9575
1752	FANTELLA	8	43	528.59	11.8447	44.0025
1673	MONTE GEMELLI	7	41	853.93	11.7186	43.9575
1712	PREMILCUORE NORD	8	42	583.26	11.7816	44.0025
1713	PREMILCUORE SUD	7	42	805.7	11.7816	43.9575
1790	MONTEMAGGIORE	10	44	377.39	11.9077	44.0925
1750	ROCCCA S.CASCIANO NORD	10	43	370.48	11.8447	44.0925
1751	ROCCCA S.CASCIANO SUD	9	43	393.42	11.8447	44.0475
2071	RONCOFREDDO	9	51	136.76	12.3491	44.0475
2031	SANTA PAOLA	9	50	209.82	12.286	44.0475
2148	SAVIGNANO A MARE	12	53	1.88	12.4752	44.1825
1754	BERLETA	6	43	559.59	11.8447	43.9125
1715	CAMPIGNA	5	42	908.26	11.7816	43.8675
1714	CORNIOLO	6	42	799.31	11.7816	43.9125
1793	S.SOFIA	7	44	423.98	11.9077	43.9575
1834	SPINELLO	6	45	707.33	11.9708	43.9125
1915	LAGO DI QUARTO	5	47	540.07	12.0969	43.8675
1953	MERCATO SARACENO OVEST	7	48	389.21	12.1599	43.9575
1914	RUSCELLO	6	47	474.57	12.0969	43.9125
1954	SARSINA	6	48	315.37	12.1599	43.9125
2109	SALA	11	52	5.82	12.4121	44.1375
2110	SAVIGNANO SUL RUBICONE	10	52	25.26	12.4121	44.0925
1992	CELLA	8	49	197.01	12.223	44.0025
1993	MERCATO SARACENO EST	7	49	349.26	12.223	43.9575
2033	MONTETIFFI	7	50	309.09	12.286	43.9575
2032	SOGLIANO SUL RUBICONE	8	50	279.61	12.286	44.0025
1671	OTTIGNANA	9	41	631.29	11.7186	44.0475
1710	S.MARIA IN CASTELLO	10	42	500.71	11.7816	44.0925
1876	MONTE COMERO	4	46	1056.2	12.0338	43.8225
1917	MONTE FUMAIOLO	3	47	1052.27	12.0969	43.7775
1877	MONTECORONARO	3	46	922.14	12.0338	43.7775
1916	RIOFREDDO	4	47	858	12.0969	43.8225
1837	VERGHERETO	3	45	844.81	11.9708	43.7775
222	RIFUGIO PRATO MOLLO	18	5	1039.14	9.44877	44.4525
99	FONTANAROSSA	21	2	880.9	9.25962	44.5875
223	PASSO DEL BOCCO	17	5	895.06	9.44877	44.4075
139	PIETRANERA	21	3	872.8	9.32268	44.5875
221	AMBORZASCO	19	5	1527.6	9.44877	44.4975
220	SANTO STEFANO D'AVETO	20	5	1380.57	9.44877	44.5425
384	MONTE GOTTERO	16	9	1311.99	9.70097	44.3625
263	CODIVARA	17	6	831.47	9.51182	44.4075
303	MONTE ZUCCONE	17	7	729.04	9.57488	44.4075
343	PASSO DI CENTO CROCI	17	8	1007.67	9.63792	44.4075
448	RONCAROLO	32	11	42.27	9.82708	45.0825
488	S.NAZZARO	32	12	40.06	9.89012	45.0825
407	CORNO GIOVINE	33	10	43.72	9.76403	45.1275
368	SAN ROCCO AL PONTE	32	9	45.2	9.70097	45.0825
287	SENNA LODIGIANA	33	7	48.04	9.57488	45.1275
327	VALLORIA	33	8	46.01	9.63792	45.1275
909	MONTE ROMECCHIO	11	22	1535.22	10.5206	44.1375
867	PASSO DELLE FORBICI	13	21	1389.29	10.4576	44.2275
827	MONTE BOCCA DI SCALA	13	20	1746.8	10.3945	44.2275
786	MONTE SILLANO	14	19	1516.51	10.3315	44.2725
971	DOSOLO	29	24	21.93	10.6467	44.9475
1091	GONZAGA	29	27	15.93	10.8359	44.9475
1051	VERGARI	29	26	16	10.7728	44.9475
1131	MOGLIA	29	28	14	10.8989	44.9475
1291	POGGIO RUSCO	29	32	7.4	11.1511	44.9475
1331	S.MARTINO IN SPINO	29	33	7.07	11.2142	44.9475
1171	BONDANELLO	29	29	15.82	10.962	44.9475
1371	PILASTRI	29	34	6.22	11.2772	44.9475
1050	SUZZARA EST	30	26	16.61	10.7728	44.9925
1010	SUZZARA OVEST	30	25	19.12	10.7098	44.9925
891	VIADANA	29	22	26.13	10.5206	44.9475
970	VILLASTRADA	30	24	25.42	10.6467	44.9925
584	PASSO DELLE GUADINE	16	14	1602.31	10.0162	44.3625
665	MONTE ACUTO	15	16	1617.48	10.1423	44.3175
706	SASSALBO	14	17	1551.55	10.2054	44.2725
423	PASSO DEI DUE SANTI	17	10	1229.22	9.76403	44.4075
462	PASSO DEL BRATTELLO	18	11	940.48	9.82708	44.4525
502	PASSO DEL RIGHEDO	18	12	1278.09	9.89012	44.4525
542	PASSO DELLA CISA SUD	18	13	1120.1	9.95317	44.4525
424	PATIGNO	16	10	1496.21	9.76403	44.3625
1216	BOMPORTO	24	30	22.31	11.025	44.7225
1255	SOLARA	25	31	16.66	11.0881	44.7675
1097	CAMPOGALLIANO	23	27	37.92	10.8359	44.6775
1096	GARGALLO	24	27	31.54	10.8359	44.7225
1334	DOGARO	26	33	12.87	11.2142	44.8125
1094	BUDRIONE	26	27	21.85	10.8359	44.8125
1135	CARPI	25	28	23.2	10.8989	44.7675
1095	CARPI CASELLO	25	27	27.57	10.8359	44.7675
1134	FOSSOLI	26	28	20.04	10.8989	44.8125
1133	NOVI DI MODENA SUD	27	28	16.6	10.8989	44.8575
1218	GAGGIO	22	30	30.75	11.025	44.6325
1259	MANZOLINO	21	31	36.69	11.0881	44.5875
1260	PIUMAZZO	20	31	55.54	11.0881	44.5425
1258	RECCOVATO	22	31	26.48	11.0881	44.6325
1299	S.MARIA IN STRADA	21	32	31.97	11.1511	44.5875
1139	BELLARIA	21	28	55.86	10.8989	44.5875
1181	CASTELVETRO DI MODENA	19	29	151.77	10.962	44.4975
1141	LEVIZZANO RANGONE	19	28	193.9	10.8989	44.4975
1213	CAVEZZO	27	30	17.15	11.025	44.8575
1172	CONCORDIA SULLA SECCHIA	28	29	17.78	10.962	44.9025
1211	VALLATA	29	30	12.64	11.025	44.9475
1107	FANANO	13	27	570.82	10.8359	44.2275
1068	FELICAROLO	12	26	1053.18	10.7728	44.1825
1069	LAGO SCAFFAIOLO	11	26	1400.29	10.7728	44.1375
1028	MONTE CIMONE	12	25	1573.55	10.7098	44.1825
1374	FINALE EMILIA	26	34	12.41	11.2772	44.8125
1333	MASSAFINALESE	27	33	9.96	11.2142	44.8575
1413	RENO FINALESE NORD	27	35	8.53	11.3403	44.8575
1373	VIAROVERE	27	34	7.84	11.2772	44.8575
1100	FIORANO MODENESE	20	27	122.4	10.8359	44.5425
988	FIUMALBO	12	24	1181.48	10.6467	44.1825
1099	FORMIGINE	21	27	72.67	10.8359	44.5875
946	FRASSINORO	14	23	1003.04	10.5837	44.2725
945	MONTE MODINO	15	23	1010.3	10.5837	44.3175
907	PIANDELLAGOTTI	13	22	1204.46	10.5206	44.2275
905	ROMANORO	15	22	801.32	10.5206	44.3175
906	ROVOLO	14	22	988.63	10.5206	44.2725
1183	GUIGLIA	17	29	419.43	10.962	44.4075
1184	ZOCCA NORD OVEST	16	29	552.53	10.962	44.3625
1025	LAMA MOCOGNO	15	25	847.62	10.7098	44.3175
986	MONTE CANTIERE	14	24	1198.78	10.6467	44.2725
1065	MONTECENERE	15	26	692.88	10.7728	44.3175
1026	SASSOSTORNO	14	25	778.42	10.7098	44.2725
1140	MARANELLO	20	28	100.51	10.8989	44.5425
1101	MONTAGNANA	19	27	272.3	10.8359	44.4975
1182	MARANO SUL PANARO	18	29	222.89	10.962	44.4525
1143	ROCCHETTA	17	28	341.27	10.8989	44.4075
1142	RODIANO	18	28	375.1	10.8989	44.4525
1254	BOSCO SALICETA	26	31	14.8	11.0881	44.8125
1253	MEDOLLA	27	31	17.86	11.0881	44.8575
1332	GAVELLO SUD	28	33	6.75	11.2142	44.9025
1252	MIRANDOLA	28	31	12.46	11.0881	44.9025
1292	MIRANDOLA EST	28	32	8.8	11.1511	44.9025
1251	S.GIOVANNI DEL DOSSO	29	31	9.3	11.0881	44.9475
1177	ALBARETO	23	29	27.34	10.962	44.6775
1098	BAGGIOVARA	22	27	47.27	10.8359	44.6325
1136	GANACETO	24	28	26.99	10.8989	44.7225
1138	MODENA	22	28	39.56	10.8989	44.6325
1179	S.DONNINO	21	29	43.49	10.962	44.5875
1178	SALICETO PANARO	22	29	32.88	10.962	44.6325
1137	VILLANOVA	23	28	33.08	10.8989	44.6775
1027	MONTE CERVAROLA	13	25	1245.84	10.7098	44.2275
984	MONTEFIORINO	16	24	616.7	10.6467	44.3625
944	TOANO	16	23	639.67	10.5837	44.3625
1147	CASTELLUCCIO	13	28	757.29	10.8989	44.2275
1186	MONTESE	14	29	747.21	10.962	44.2725
1146	MONTESPECCHIO	14	28	516.54	10.8989	44.2725
1185	ZOCCA SUD OVEST	15	29	570.17	10.962	44.3175
1217	NONANTOLA	23	30	23.17	11.025	44.6775
1257	NONANTOLA EST	23	31	19.29	11.0881	44.6775
1256	RAVARINO	24	31	18.61	11.0881	44.7225
1174	CORTILE	26	29	19.39	10.962	44.8125
1132	NOVI DI MODENA	28	28	16.41	10.8989	44.9025
985	PALAGANO	15	24	838.1	10.6467	44.3175
1144	CASTAGNETO	16	28	416.49	10.8989	44.3625
1106	GAIATO	14	27	536.54	10.8359	44.2725
1064	MONTEBONELLO	16	26	622.38	10.7728	44.3625
1104	PAVULLO NEL FRIGNANO NORD	16	27	674.59	10.8359	44.3625
1105	PAVULLO NEL FRIGNANO SUD	15	27	692.48	10.8359	44.3175
1145	VERICA	15	28	494.08	10.8989	44.3175
949	MONTE GIOVO	11	23	1454.03	10.5837	44.1375
947	PIEVEPELAGO NORD	13	23	1268.25	10.5837	44.2275
948	PIEVEPELAGO SUD	12	23	1158.96	10.5837	44.1825
908	S.ANNA PELAGO	12	22	1326.32	10.5206	44.1825
1023	GOMBOLA	17	25	493.91	10.7098	44.4075
1024	POLINAGO	16	25	753.24	10.7098	44.3625
1022	PRIGNANO SULLA SECCHIA EST	18	25	455.81	10.7098	44.4525
983	SALTINO	17	24	507.53	10.6467	44.4075
987	RIOLUNATO	13	24	984.49	10.6467	44.2275
1219	CASTELFRANCO EMILIA	21	30	40.66	11.025	44.5875
1294	CAMPOSANTO	26	32	13.54	11.1511	44.8125
1293	S.FELICE SUL PANARO	27	32	13.63	11.1511	44.8575
1173	S.ANTONIO IN MERCADELLO	27	29	18.93	10.962	44.8575
1212	S.POSSIDONIO	28	30	14.16	11.025	44.9025
1215	S.PROSPERO	25	30	20.13	11.025	44.7675
1214	STAGGIA	26	30	19.46	11.025	44.8125
1061	S.MICHELE DEI MUCCHIETTI	19	26	288.02	10.7728	44.4975
1060	SASSUOLO	20	26	140.38	10.7728	44.5425
1102	PAZZANO	18	27	433.67	10.8359	44.4525
1062	PESCAROLA	18	26	513.42	10.7728	44.4525
1103	S.DALMAZIO	17	27	610.88	10.8359	44.4075
1063	SERRAMAZZONI	17	26	699.84	10.7728	44.4075
1066	ACQUARIA	14	26	706.91	10.7728	44.2725
1067	SESTOLA	13	26	932.3	10.7728	44.2275
1175	LIMIDI	25	29	21.58	10.962	44.7675
1176	SOZZIGALLI	24	29	25.34	10.962	44.7225
1180	CASTELNUOVO RANGONE	20	29	71.2	10.962	44.5425
1220	SPILAMBERTO	20	30	59.63	11.025	44.5425
1221	VIGNOLA	19	30	99.96	11.025	44.4975
1223	CIANO	17	30	388.89	11.025	44.4075
1225	ZOCCA SUD EST	15	30	740.53	11.025	44.3175
382	CAMPI	18	9	599.12	9.70097	44.4525
383	MONTEGROPPO	17	9	995.77	9.70097	44.4075
378	BARDI OVEST	22	9	695	9.70097	44.6325
299	CORNOLO	21	7	1125.25	9.57488	44.5875
379	CREDAROLA	21	9	720.68	9.70097	44.5875
417	MONTE CARAMATO	23	10	887.71	9.76403	44.6775
419	NOVEGLIA	21	10	697.93	9.76403	44.5875
338	PIONE	22	8	805.07	9.63792	44.6325
341	BEDONIA	19	8	563.92	9.63792	44.4975
301	CANESO	19	7	928.68	9.57488	44.4975
300	DRUSCO	20	7	943.51	9.57488	44.5425
260	MONTE MAGGIORASCA	20	6	1313.63	9.51182	44.5425
261	MONTE PENNA	19	6	1170.77	9.51182	44.4975
340	NOCIVEGLIA	20	8	979.17	9.63792	44.5425
339	SCOPOLO	21	8	814.16	9.63792	44.5875
581	BERCETO	19	14	1046.78	10.0162	44.4975
539	BORGOTARO	21	13	435.16	9.95317	44.5875
580	CASTELLONCHIO	20	14	818.69	10.0162	44.5425
541	PASSO DELLA CISA EST	19	13	767.43	9.95317	44.4975
540	ROCCAPREBALZA	20	13	565.08	9.95317	44.5425
456	POZZOLO	24	11	600.59	9.82708	44.7225
421	BROGO VAL DI TARO	19	10	555.82	9.76403	44.4975
420	CAFFARACCIA	20	10	857.92	9.76403	44.5425
461	COSTERBOSA	19	11	632.6	9.82708	44.4975
501	PASSO DELLA CISA OVEST	19	12	881.89	9.89012	44.4975
422	SAN VINCENZO	18	10	755.39	9.76403	44.4525
460	TESTANELLO	20	11	796.71	9.82708	44.5425
610	FRESCAROLO	30	15	32.71	10.0793	44.9925
611	RONCOLE VERDI	29	15	38.55	10.0793	44.9475
571	S.ANDREA	29	14	44.79	10.0162	44.9475
659	CALESTANO	21	16	693.49	10.1423	44.5875
695	COLLECCHIO	25	17	92.18	10.2054	44.7675
656	OZZANO TARO	24	16	134.09	10.1423	44.7225
735	STRADELLA	25	18	90.51	10.2684	44.7675
771	COLTARO	29	19	26.67	10.3315	44.9475
811	COPERMIO	29	20	24.74	10.3945	44.9475
812	MAZZABUE	28	20	24.85	10.3945	44.9025
380	PRATO DELLE FEMMINE	20	9	831.11	9.70097	44.5425
381	STRELA	19	9	535.81	9.70097	44.4975
621	CORNIGLIO NORD	19	15	871.39	10.0793	44.4975
622	CORNIGLIO SUD	18	15	925.62	10.0793	44.4525
582	MARRA	18	14	1030.15	10.0162	44.4525
583	MONTE MARMAGNA	17	14	1316.25	10.0162	44.4075
620	PUGNETOLO	20	15	1079.14	10.0793	44.5425
660	SIGNATICO	20	16	683	10.1423	44.5425
737	FELINO	23	18	216.37	10.2684	44.6775
612	BASTELLI	28	15	51.99	10.0793	44.9025
572	CASTIONE MARCHESI	28	14	60.6	10.0162	44.9025
614	COSTA PAVESE	26	15	132.18	10.0793	44.8125
613	FIDENZA	27	15	72.06	10.0793	44.8575
573	FORNIO	27	14	102.06	10.0162	44.8575
653	CASALBARBATO	27	16	57.82	10.1423	44.8575
652	PAROLETTA	28	16	44.57	10.1423	44.9025
693	FONTEVIVO	27	17	47.79	10.2054	44.8575
617	FORNOVO DI TARO	23	15	205.85	10.0793	44.6775
657	RESPICCIO	23	16	270.33	10.1423	44.6775
738	LANGHIRANO NORD	22	18	306.32	10.2684	44.6325
699	PRANELLO	21	17	659.31	10.2054	44.5875
698	TORDENASO	22	17	463.56	10.2054	44.6325
739	LANGHIRANO SUD	21	18	427.94	10.2684	44.5875
778	LESIGNANO DE BAGNI	22	19	274.58	10.3315	44.6325
655	MEDESANO	25	16	123.04	10.1423	44.7675
576	ROCCALANZONA	24	14	367.61	10.0162	44.7225
616	S.ANDREA BAGNI	24	15	253.34	10.0793	44.7225
575	VARANO DEI MARCHESI	25	14	295.26	10.0162	44.7675
663	MONCHIO DELLE CORTI	17	16	921.12	10.1423	44.4075
624	MONTE SILLARA	16	15	1442.46	10.0793	44.3625
664	PASSO DEL LAGASTRELLO	16	16	1136.21	10.1423	44.3625
623	RIANA	17	15	1244.77	10.0793	44.4075
817	MONTECHIARUGOLO	23	20	127.64	10.3945	44.6775
816	MONTICELLI TERME	24	20	96.65	10.3945	44.7225
740	CASTELMOZZANO	20	18	543.56	10.2684	44.5425
819	CIANO D'ENZA	21	20	303.38	10.3945	44.5875
780	LUPAZZANO	20	19	399.64	10.3315	44.5425
779	NEVIANO DEGLI ARDUINI	21	19	360.54	10.3315	44.5875
781	VETTO	19	19	517.03	10.3315	44.4975
694	CASTELGUELFO	26	17	64.74	10.2054	44.8125
615	COSTAMEZZANA	25	15	225.2	10.0793	44.7675
654	GALVANA	26	16	86.92	10.1423	44.8125
702	CALATTA	18	17	825.13	10.2054	44.4525
662	MONTE CAIO	18	16	1096.71	10.1423	44.4525
703	VAIRO	17	17	816.85	10.2054	44.4075
814	CHIOZZOLA	26	20	38.29	10.3945	44.8125
815	COLORETO	25	20	56.74	10.3945	44.7675
774	PARMA	26	19	50.03	10.3315	44.8125
775	PARMA SUD	25	19	73.59	10.3315	44.7675
813	RAMADESE	27	20	29.27	10.3945	44.8575
733	RONCOPASCOLO	27	18	39.03	10.2684	44.8575
773	S.MARTINO	27	19	35.97	10.3315	44.8575
734	S.PANCRAZIO	26	18	55.26	10.2684	44.8125
736	SALA BAGANZA EST	24	18	135.13	10.2684	44.7225
776	VIGATTO	24	19	113.33	10.3315	44.7225
495	BESOZZOLA	25	12	466.23	9.89012	44.7675
496	CASTELLARO	24	12	575.39	9.89012	44.7225
536	PELLEGRINO PARMENSE	24	13	460.89	9.95317	44.7225
609	POLESINE PARMENSE	31	15	31.09	10.0793	45.0375
690	ROCCABIANCA	30	17	28.43	10.2054	44.9925
697	S.MICHELE DE'GATTI	23	17	272	10.2054	44.6775
696	SALA BAGANZA OVEST	24	17	170.69	10.2054	44.7225
535	GROTTA	25	13	396.18	9.95317	44.7675
574	SALSOMAGGIORE TERME	26	14	184.46	10.0162	44.8125
534	SCIPIONE	26	13	250.27	9.95317	44.8125
692	CASTEL'AICARDI	28	17	35.97	10.2054	44.9025
691	PORTONE DEL PIZZO	29	17	31.47	10.2054	44.9475
730	GRAMIGNAZZO	30	18	26.54	10.2684	44.9925
578	MONTE S.ANTONIO	22	14	379.97	10.0162	44.6325
538	PRELERNA	22	13	493.67	9.95317	44.6325
651	SORAGNA	29	16	35.65	10.1423	44.9475
852	MEZZANO INFERIORE	28	21	24.46	10.4576	44.9025
853	SORBOLO	27	21	28.57	10.4576	44.8575
618	BARDONE	22	15	469.07	10.0793	44.6325
579	CASSIO	21	14	583.05	10.0162	44.5875
619	CASTELLO DI CASOLA	21	15	721.76	10.0793	44.5875
658	LESIGNANO PALMIA	22	16	411.05	10.1423	44.6325
700	ALBAZZANO	20	17	540.67	10.2054	44.5425
741	MONTE FUSO	19	18	758.06	10.2684	44.4975
661	PETRIGNACOLA	19	16	859.25	10.1423	44.4975
701	TIZZANO VAL PARMA	19	17	789.44	10.2054	44.4975
302	CASALE	18	7	877.48	9.57488	44.4525
342	RAVEZZA	18	8	771.58	9.63792	44.4525
262	S.MARIA DEL TARO	18	6	1037.79	9.51182	44.4525
772	TORRILE	28	19	30.14	10.3315	44.9025
777	PANOCCHIA	23	19	160.72	10.3315	44.6775
818	TRAVERSETOLO	22	20	190.08	10.3945	44.6325
732	RONCO-CAMPO	28	18	32.18	10.2684	44.9025
731	TRECASALI	29	18	29.5	10.2684	44.9475
500	GRANARA	20	12	524.54	9.89012	44.5425
459	MARIANO	21	11	900.99	9.82708	44.5875
499	PIEVE DI GUSALIGGIO	21	12	601.82	9.89012	44.5875
577	VARANO DE'MELEGARI	23	14	277.23	10.0162	44.6775
537	VIANINO	23	13	353.99	9.95317	44.6775
418	BARDI EST	22	10	546.42	9.76403	44.6325
497	CASTELLO DI GOLASO	23	12	424.06	9.89012	44.6775
498	PESSOLA	22	12	716.22	9.89012	44.6325
458	TOSCA	22	11	649.43	9.82708	44.6325
457	VARSI	23	11	580.17	9.82708	44.6775
650	ARDOLA	30	16	29.75	10.1423	44.9925
168	RIPALDINA	32	4	74.77	9.38573	45.0825
96	BRALLO	24	2	1032.21	9.25962	44.7225
136	FELIGARA	24	3	846.15	9.32268	44.7225
247	CHIGNOLO PO	33	6	48.38	9.51182	45.1275
91	CASEO	29	2	459	9.25962	44.9475
134	CANEDO	26	3	942.04	9.32268	44.8125
133	ROMAGNESE	27	3	699.48	9.32268	44.8575
95	CEGNI	25	2	1070.31	9.25962	44.7675
130	SANTA MARIA DELLA VERSA	30	3	290	9.32268	44.9925
131	STADERA	29	3	503.12	9.32268	44.9475
92	RUINO	28	2	374.07	9.25962	44.9025
2276	MONTECALVO IN FOGLIA	4	56	172.16	12.6643	43.8225
2076	VILLAGRANDE	4	51	991.31	12.3491	43.8225
2115	SAVIGNANO	5	52	477.52	12.4121	43.8675
2236	CASININA	4	55	198.75	12.6013	43.8225
251	AGAZZANO	29	6	204.95	9.51182	44.9475
250	TAVERNAGO	30	6	102.95	9.51182	44.9925
532	ALSERRO	28	13	79.52	9.95317	44.9025
533	CASTELNUOVO FOGLIANI	27	13	142.52	9.95317	44.8575
570	BERSANO	30	14	39.09	10.0162	44.9925
336	GROPPODUCALE	24	8	963.78	9.63792	44.7225
294	MONTE BARBIERI	26	7	567.84	9.57488	44.8125
335	MONTE OBOLO	25	8	656.35	9.63792	44.7675
295	PASSO DEL CERRO	25	7	657.3	9.57488	44.7675
255	PICCOLI	25	6	709.67	9.51182	44.7675
334	RECESIO	26	8	469.58	9.63792	44.8125
175	BOBBIO	25	4	440.34	9.38573	44.7675
174	CADEMONTE	26	4	679.86	9.38573	44.8125
214	CASSOLO	26	5	402.19	9.44877	44.8125
135	CECI	25	3	842.44	9.32268	44.7675
249	AGAZZINO	31	6	73.35	9.51182	45.0375
209	CASTEL S.GIOVANNI	31	5	89.33	9.44877	45.0375
210	ZIANO PIACENTINO EST	30	5	140.48	9.44877	44.9925
450	CADEO	30	11	57.68	9.82708	44.9925
490	CHIAVENNA LANDI	30	12	51.42	9.89012	44.9925
288	CALENDASCO	32	7	52.62	9.57488	45.0825
328	PIACENZA OVEST	32	8	48.41	9.63792	45.0825
489	CAORSO	31	12	43.27	9.89012	45.0375
449	RONCAGLIA	31	11	45.97	9.82708	45.0375
412	GODI	28	10	134.61	9.76403	44.9025
452	VIGOSTANO	28	11	112.21	9.82708	44.9025
451	ZENA	29	11	75.52	9.82708	44.9475
208	BOSCO TOSCA	32	5	57.51	9.44877	45.0825
169	GANAGHELLO	31	4	113.91	9.38573	45.0375
493	CASTEL'ARCUATO	27	12	181.24	9.89012	44.8575
453	CHIAVENNA ROCCHETTA	27	11	219.89	9.82708	44.8575
568	CASTELVETRO PIACENTINO	32	14	34.36	10.0162	45.0825
178	SELVA	22	4	843.35	9.38573	44.6325
137	ZERBA	23	3	669.31	9.32268	44.6775
216	CORNARO	24	5	1019.9	9.44877	44.7225
215	PIANCASALE	25	5	861.3	9.44877	44.7675
176	MARSAGLIA	24	4	562.43	9.38573	44.7225
177	OZZOLA	23	4	683.15	9.38573	44.6775
530	CORTEMAGGIORE	30	13	47.02	9.95317	44.9925
337	BOCCOLO DEI TASSI	23	8	881.35	9.63792	44.6775
296	FARINI	24	7	702.53	9.57488	44.7225
297	GROPPALLO	23	7	631.2	9.57488	44.6775
256	PRADOVERA	24	6	939.81	9.51182	44.7225
217	BRUGNETO	23	5	1069.68	9.44877	44.6775
298	CASSIMORENGA	22	7	958.81	9.57488	44.6325
219	CASTAGNOLA	21	5	1240.9	9.44877	44.5875
257	CENTENARO	23	6	914.55	9.51182	44.6775
258	FERRIERE	22	6	878.15	9.51182	44.6325
259	MONTE RAGOLA	21	6	1232.13	9.51182	44.5875
218	PASSO DEL MERCATELLO	22	5	999.85	9.44877	44.6325
531	CHIARAVALLE DELLA COLOMBA	29	13	53.39	9.95317	44.9475
491	FONTANAFREDDA	29	12	68.96	9.89012	44.9475
492	LUISURASCO	28	12	103.3	9.89012	44.9025
291	GAZZOLA	29	7	147.45	9.57488	44.9475
252	MONTEVENTANO	28	6	395.5	9.51182	44.9025
330	GOSSOLENGO	30	8	87.19	9.63792	44.9925
290	CASALIGGIO	30	7	88.36	9.57488	44.9925
289	ROTTOFRENO	31	7	66.01	9.57488	45.0375
374	RIGLIO	26	9	462.22	9.70097	44.8125
413	SARIANO	27	10	249.72	9.76403	44.8575
414	GROPPARELLO	26	10	378.74	9.76403	44.8125
454	LUGAGNANO VAL D'ARDA	26	11	295.7	9.82708	44.8125
487	CASTELNUOVO BOCCA D'ADDA	33	12	37.6	9.89012	45.1275
528	MONTICELLI D'ONGINA	32	13	36.39	9.95317	45.0825
416	BORE OVEST	24	10	673.45	9.76403	44.7225
376	MORFASSO	24	9	800.21	9.70097	44.7225
377	PASSO DEL PELIZZONE	23	9	1033.96	9.70097	44.6775
415	RUSTIGAZZO	25	10	545.76	9.76403	44.7675
375	SAN MICHELE	25	9	678.87	9.70097	44.7675
171	TREVOZZO	29	4	287.55	9.38573	44.9475
98	BELNOME	22	2	1060.87	9.25962	44.6325
179	OREZZOLI	21	4	1022.86	9.38573	44.5875
138	OTTONE	22	3	724.1	9.32268	44.6325
132	NIBBIANO	28	3	419.56	9.32268	44.9025
173	PECORARA	27	4	629.75	9.38573	44.8575
213	SEVIZZANO	27	5	631.08	9.44877	44.8575
408	MORTIZZA	32	10	43.64	9.76403	45.0825
369	PIACENZA	31	9	58.4	9.70097	45.0375
409	PIACENZA CASELLO	31	10	50.06	9.76403	45.0375
329	S.ANTONIO TREBBIA	31	8	63.93	9.63792	45.0375
211	PIANELLO VAL TIDONE	29	5	273.71	9.44877	44.9475
172	ROCCA D'OLGISIO	28	4	443.3	9.38573	44.9025
212	AZZANO	28	5	452.06	9.44877	44.9025
371	PODENZANO	29	9	116.05	9.70097	44.9475
370	TURRO	30	9	78.75	9.70097	44.9925
373	CASTIONE	27	9	304.63	9.70097	44.8575
333	PONTE DELL'OLIO	27	8	337.43	9.63792	44.8575
410	PONTENURE	30	10	69.54	9.76403	44.9925
331	OTTAVELLO	29	8	119.88	9.63792	44.9475
332	RIVERGARO EST	28	8	214.1	9.63792	44.9025
411	S.GIORGIO PIACENTINO	29	10	92.07	9.76403	44.9475
372	VIGOLZONE	28	9	165.36	9.70097	44.9025
529	S.PIETRO IN CERRO	31	13	38.85	9.95317	45.0375
248	PRIMA ANSA PO	32	6	52.58	9.51182	45.0825
253	BOBBIANO	27	6	363.48	9.51182	44.8575
293	CASTELLO DI MONTECHIARO	27	7	392.28	9.57488	44.8575
254	PERINO	26	6	382.27	9.51182	44.8125
292	RIVERGARO OVEST	28	7	269.98	9.57488	44.9025
455	CORNINI	25	11	537.97	9.82708	44.7675
494	VIGOLENO	26	12	282.26	9.89012	44.8125
569	SOARZA	31	14	35.17	10.0162	45.0375
97	VEZIMO	23	2	1074.69	9.25962	44.6775
170	ZIANO PIACENTINO OVEST	30	4	233.54	9.38573	44.9925
989	ABETONE	11	24	1460.76	10.6467	44.1375
1029	LIBRO APERTO	11	25	1643.62	10.7098	44.1375
1151	PRACCHIA	9	28	760.35	10.8989	44.0475
1190	GRANAGLIONE	10	29	810.69	10.962	44.0925
1230	SAMBUCA PISTOIESE	10	30	740.95	11.025	44.0925
1110	CORNO ALLE SCALE	10	27	1403.71	10.8359	44.0925
1310	MONTEPIANO	10	32	914.02	11.1511	44.0925
1861	ALFONSINE	19	46	2.79	12.0338	44.4975
1819	LONGASTRINO OVEST	21	45	-0.92	11.9708	44.5875
1821	S.SAVINO	19	45	2.02	11.9708	44.4975
1900	SAVARNA NORD	20	47	-0.09	12.0969	44.5425
1860	TAGLIO CORELLI	20	46	0.56	12.0338	44.5425
1823	COTIGNOLA	17	45	8.96	11.9708	44.4075
1822	FUSIGNANO	18	45	5.12	11.9708	44.4525
1862	PRATI	18	46	2.32	12.0338	44.4525
1743	VILLA S.MARTINO	17	43	14.34	11.8447	44.4075
1707	BRISIGHELLA	13	42	144.61	11.7816	44.2275
1668	CATELLINA	12	41	301.75	11.7186	44.1825
1628	CAVINA S.PIETRO	12	40	445.28	11.6555	44.1825
1708	MODIGLIANA NORD	12	42	292.38	11.7816	44.1825
1669	S.CASSIANO	11	41	439.04	11.7186	44.1375
1629	S.MARTINO GATTARA	11	40	491.71	11.6555	44.1375
1747	SARNA	13	43	112.09	11.8447	44.2275
1706	TEBANO	14	42	120.77	11.7816	44.2725
1667	ZATTAGLIA	13	41	257.43	11.7186	44.2275
1588	BAFFADI	12	39	443.87	11.5925	44.1825
1627	CASOLA VALSENIO EST	13	40	307.16	11.6555	44.2275
1587	CASOLA VALSENIO OVEST	13	39	422.36	11.5925	44.2275
1705	CASTEL BOLOGNESE	15	42	56.54	11.7816	44.3175
2026	CASTIGLIONE DI CERVIA	14	50	-0.01	12.286	44.2725
2066	MILANO MARITTIMA	14	51	-0.05	12.3491	44.2725
2067	PINARELLA	13	51	-1.08	12.3491	44.2275
1740	CONSELICE NORD	20	43	1.68	11.8447	44.5425
1741	CONSELICE SUD	19	43	2.99	11.8447	44.4975
1784	S.SEVERO	16	44	17.28	11.9077	44.3625
1824	BONCELLINO	16	45	12.26	11.9708	44.3625
1826	COSINA	14	45	19.59	11.9708	44.2725
1786	FAENZA	14	44	35.56	11.9077	44.2725
1785	FAENZA CASELLO	15	44	21.62	11.9077	44.3175
1745	FAENZA NORD-OVEST	15	43	31.86	11.8447	44.3175
1746	FAENZA SUD-OVEST	14	43	61.99	11.8447	44.2725
1825	PIEVE DI CESATO	15	45	16.35	11.9708	44.3175
1787	S. LUCIA DELLE SPIANATE	13	44	92.4	11.9077	44.2275
1781	BELRICETTO	19	44	3.56	11.9077	44.4975
1782	CA' DI LUGO	18	44	7.02	11.9077	44.4525
1780	GIOVECCA	20	44	2.12	11.9077	44.5425
1783	LUGO	17	44	12.08	11.9077	44.4075
1820	VOLTANA	20	45	0.67	11.9708	44.5425
1742	MASSA LOMBARDA	18	43	7.82	11.8447	44.4525
1701	VILLA SERRAGLIO	19	42	7	11.7816	44.4975
2064	BOCCA BEVANO	16	51	1.35	12.3491	44.3625
1986	BORGHETTO	14	49	2.77	12.223	44.2725
1942	CAMERLONA	18	48	-0.66	12.1599	44.4525
1985	CAMPIANO	15	49	-1.41	12.223	44.3175
2020	CASAL BORSETTI	20	50	0.09	12.286	44.5425
2019	CASAL BORSETTI NORD	21	50	0	12.286	44.5875
1987	CASE MURATE	13	49	12.25	12.223	44.2275
2018	FOCE DEL RENO	22	50	0.68	12.286	44.6325
2063	FOCE FIUMI UNITI	17	51	-0.27	12.3491	44.4075
2024	FOSSO GHIAIA	16	50	-0.93	12.286	44.3625
1903	GODO	17	47	1.48	12.0969	44.4075
2023	LIDO ADRIANO	17	50	-1.5	12.286	44.4075
2065	LIDO DI CLASSE	15	51	-0.9	12.3491	44.3175
1944	LONGANA	16	48	1.44	12.1599	44.3625
1980	MANDRIOLE	20	49	-0.76	12.223	44.5425
2021	MARINA DI RAVENNA	19	50	0.9	12.286	44.4975
1902	MEZZANO	18	47	1.23	12.0969	44.4525
2022	PUNTA MARINA	18	50	-0.21	12.286	44.4525
1981	PUNTE ALBERETE	19	49	0.01	12.223	44.4975
1983	RAVENNA	17	49	-0.1	12.223	44.4075
1982	RAVENNA NORD	18	49	-0.76	12.223	44.4525
1943	RAVENNA OVEST	17	48	0.36	12.1599	44.4075
1984	RAVENNA SUD	16	49	-1.67	12.223	44.3625
1940	S.ALBERTO	20	48	-1.04	12.1599	44.5425
1941	S.ALBERTO SUD	19	48	-0.88	12.1599	44.4975
1946	S.PIETRO IN CAMPIANO	14	48	8.18	12.1599	44.2725
1905	S.PIETRO IN TRENTO	15	47	6.47	12.0969	44.3175
1945	S.PIETRO IN VINCOLI	15	48	2.79	12.1599	44.3175
2025	SAVIO	15	50	-1.44	12.286	44.3175
1901	TORRI	19	47	0.77	12.0969	44.4975
1979	VALLE MAGNIAVACCA SUD-EST	21	49	-1.97	12.223	44.5875
1666	RIOLO TERME	14	41	131.76	11.7186	44.2725
1626	TORANELLO	14	40	193.27	11.6555	44.2725
1904	RONCALCECI	16	47	3.57	12.0969	44.3625
1864	RUSSI	16	46	7.66	12.0338	44.3625
1863	TRAVERSARA	17	46	5.45	12.0338	44.4075
1744	SOLAROLO	16	43	21.94	11.8447	44.3625
938	ALBINEA	22	23	134.44	10.5837	44.6325
939	CAVAZZONE	21	23	329.27	10.5837	44.5875
978	FOGLIANO	22	24	90.8	10.6467	44.6325
941	BAISO	19	23	444.94	10.5837	44.4975
981	CASTELVECCHIO	19	24	335.43	10.6467	44.4975
982	PRIGNANO SULLA SECCHIA OVEST	18	24	366.83	10.6467	44.4525
857	BIBBIANO	23	21	111.14	10.4576	44.6775
932	PIEVE SALICETO	28	23	20.62	10.5837	44.9025
892	BRESCELLO	28	22	22.19	10.5206	44.9025
784	BUSANA	16	19	788.32	10.3315	44.3625
783	MONTEDURO	17	19	867.89	10.3315	44.4075
935	CADELBOSCO DI SOPRA	25	23	29.59	10.5837	44.7675
974	CADELBOSCO DI SOTTO	26	24	21.44	10.6467	44.8125
1053	CAMPAGNOLO EMILIA	27	26	20.15	10.7728	44.8575
895	CAMPEGINE	25	22	34.98	10.5206	44.7675
820	RONCAGLIO	20	20	443.53	10.3945	44.5425
902	CARPINETI	18	22	600.71	10.5206	44.4525
903	CAVOLA	17	22	508.39	10.5206	44.4075
942	VALESTRA	18	23	574.92	10.5837	44.4525
1059	CASALGRANDE	21	26	85.81	10.7728	44.5875
1058	RUBIERA SUD	22	26	56.52	10.7728	44.6325
901	CASINA	19	22	594.71	10.5206	44.4975
860	CORTOGNO	20	21	515.53	10.4576	44.5425
861	LEGUIGNO	19	21	588.56	10.4576	44.4975
900	MONTE DURO	20	22	469.31	10.5206	44.5425
1020	CASTELLARANO NORD	20	25	257.64	10.7098	44.5425
1021	CASTELLARANO SUD	19	25	247.03	10.7098	44.4975
934	CATELNOVO DI SOTTO	26	23	23.63	10.5837	44.8125
933	MELETOLE	27	23	19.4	10.5837	44.8575
822	CASTELNUOVO NE'MONTI NORD	18	20	633.16	10.3945	44.4525
823	CASTELNUOVO NE'MONTI SUD	17	20	663.08	10.3945	44.4075
863	GATTA	17	21	549.64	10.4576	44.4075
862	MAGONFIA	18	21	665.58	10.4576	44.4525
897	CAVRIAGO	23	22	100.79	10.5206	44.6775
896	QUERCIOLI	24	22	53.5	10.5206	44.7225
746	CIMA BELFIORE	14	18	1471.72	10.2684	44.2725
745	COLLAGNA	15	18	1105.62	10.2684	44.3175
744	MONTE VENTASSO	16	18	1101.97	10.2684	44.3625
705	PASSO DEL CERRETO	15	17	1410.51	10.2054	44.3175
1055	CORREGGIO	25	26	30.01	10.7728	44.7675
1054	RIO SALICETO	26	26	24.75	10.7728	44.8125
1015	S.MICHELE	25	25	29.55	10.7098	44.7675
1092	ROLO	28	27	17.08	10.8359	44.9025
854	FIESSO	26	21	35.12	10.4576	44.8125
894	OLMO	26	22	29.86	10.5206	44.8125
855	S.ILARIO D'ENZA	25	21	48.24	10.4576	44.7675
972	GUASTALLA	28	24	20.75	10.6467	44.9025
1012	LUZZARA-NOVELLARA	28	25	16.57	10.7098	44.9025
973	S.VITTORIA	27	24	19.25	10.6467	44.8575
785	LIGONCHIO	15	19	1035.93	10.3315	44.3175
826	MONTE CUSNA	14	20	1663.47	10.3945	44.2725
825	RIFUGIO ZAMBONI	15	20	1359.71	10.3945	44.3175
1011	LUZZARA	29	25	18.35	10.7098	44.9475
856	PARTITORE	24	21	74.77	10.4576	44.7225
1013	NOVELLARA	27	25	19.4	10.7098	44.8575
1014	VEZZOLA	26	25	24.34	10.7098	44.8125
893	POVIGLIO	27	22	24.71	10.5206	44.8575
898	MONTECAVOLO	22	22	171.4	10.5206	44.6325
858	QUATTRO CASTELLA	22	21	208.93	10.4576	44.6325
742	CERREGGIO	18	18	587.49	10.2684	44.4525
743	RAMISETO	17	18	966.77	10.2684	44.4075
704	SUCCISO	16	17	1130.61	10.2054	44.3625
975	BAGNOLO IN PIANO	25	24	27.54	10.6467	44.7675
1017	MASONE	23	25	48.88	10.7098	44.6775
1016	MASSENZATICO	24	25	36.45	10.7098	44.7225
976	REGGIO CASELLO	24	24	39.01	10.6467	44.7225
977	REGGIO EMILIA	23	24	58.44	10.6467	44.6775
937	RIVALTA	23	23	76.1	10.5837	44.6775
936	RONCOCESI	24	23	42.02	10.5837	44.7225
1052	TESTA	28	26	17.12	10.7728	44.9025
1093	FABBRICO EST	27	27	18.83	10.8359	44.8575
1057	RUBIERA NORD	23	26	42.86	10.7728	44.6775
1056	S.MARTINO IN RIO	24	26	34.76	10.7728	44.7225
859	CANOSSA	21	21	384.81	10.4576	44.5875
1018	SABBIONE	22	25	66.45	10.7098	44.6325
1019	SCANDIANO EST	21	25	148.7	10.7098	44.5875
979	SCANDIANO OVEST	21	24	218.15	10.6467	44.5875
943	BEBBIO	17	23	495.98	10.5837	44.4075
904	QUARA	16	22	691.06	10.5206	44.3625
782	CASELLA	18	19	528.86	10.3315	44.4525
821	VEDRIANO	19	20	498.61	10.3945	44.4975
899	PACORILE	21	22	299.25	10.5206	44.5875
940	REGNANO	20	23	388.93	10.5837	44.5425
980	VIANO	20	24	246.31	10.6467	44.5425
866	CERVAROLO	14	21	1261.58	10.4576	44.2725
865	SECCHIO	15	21	955.1	10.4576	44.3175
824	SOLOGNO	16	20	788.78	10.3945	44.3625
864	VILLA MINOZZO	16	21	659.35	10.4576	44.3625
2149	IGEA MARINA	11	53	3.91	12.4752	44.1375
1957	CASTELDELCI	3	48	758.5	12.1599	43.7775
1956	TAVOLICCI	4	48	730.87	12.1599	43.8225
2313	CATTOLICA	7	57	15.75	12.7274	43.9575
2233	CORIANO	7	55	69.75	12.6013	43.9575
2193	MULAZZANO	7	54	122.97	12.5382	43.9575
2234	GEMMANO	6	55	174.08	12.6013	43.9125
2195	ONFERNO	5	54	260.95	12.5382	43.8675
2075	RANCALICCIO	5	51	709.98	12.3491	43.8675
2312	MISANO ADRIATICO	8	57	2.2	12.7274	44.0025
2273	MISANO MONTE	7	56	53.79	12.6643	43.9575
2235	MONTEFIORE CONCA	5	55	233.29	12.6013	43.8675
2315	MONTEGRIDOLFO	5	57	94.69	12.7274	43.8675
2194	MONTE COLOMBO	6	54	249.06	12.5382	43.9125
2274	MORCIANO DI ROMAGNA	6	56	92.73	12.6643	43.9125
2035	MAIOLO	5	50	443.77	12.286	43.8675
1994	SAVIGNANO DI RIGO	6	49	486.62	12.223	43.9125
1997	MIRATOIO	3	49	621.36	12.223	43.7775
2037	MONTE CARPEGNA OVEST	3	50	888.79	12.286	43.7775
2036	PENNABILLI	4	50	633.1	12.286	43.8225
2111	POGGIO BERNI	9	52	60.14	12.4121	44.0475
2272	RICCIONE	8	56	14.27	12.6643	44.0025
2150	CASTELLABATE	10	53	16.06	12.4752	44.0925
2192	CERASOLO	8	54	55.61	12.5382	44.0025
2230	RIMINI NORD	10	55	1.7	12.6013	44.0925
2191	RIMINI OVEST	9	54	21.65	12.5382	44.0475
2231	RIMINI SUD	9	55	4.78	12.6013	44.0475
2232	S.LORENZO IN CORREGGIANO	8	55	23.27	12.6013	44.0025
2152	S.PAOLO	8	53	108.15	12.4752	44.0025
2151	SANTARCANGELO DI ROMAGNA	9	53	36.39	12.4752	44.0475
2190	VISERBA	10	54	5.98	12.5382	44.0925
2314	S.MARIA PIETRAFITTA	6	57	71.68	12.7274	43.9125
2275	SALUDECIO	5	56	224.53	12.6643	43.8675
2074	SAN LEO	6	51	362.93	12.3491	43.9125
2114	SAN MARINO SUD	6	52	365.63	12.4121	43.9125
1955	PAGNO	5	48	508.61	12.1599	43.8675
1996	PONTE MESSA	4	49	478.98	12.223	43.8225
1995	SANT'AGATA FELTRIA	5	49	635.01	12.223	43.8675
2034	NOVAFELTRIA	6	50	375.16	12.286	43.9125
2073	MONTEBELLO DI TORRIANA	7	51	255.79	12.3491	43.9575
2112	VILLA VERRUCCHIO	8	52	127.43	12.4121	44.0025
2113	S.MARINO OVEST	7	52	206.34	12.4121	43.9575
1931	ARIANO POLESINE	29	48	-1.23	12.1599	44.9475
1971	ARIOLO	29	49	-0.45	12.223	44.9475
2012	S.GIUSTINA	28	50	-2.14	12.286	44.9025
1890	CORBOLA	30	47	1.81	12.0969	44.9925
1770	CRESPINO	30	44	0.45	11.9077	44.9925
1491	GAIBA	29	37	6.28	11.4664	44.9475
1730	ARGINELLO	30	43	2.49	11.8447	44.9925
1690	GUARDA VENETA	30	42	2.38	11.7816	44.9925
1572	OCCHIOBELLO	28	39	4.62	11.5925	44.9025
1850	PAPOZZE	30	46	0.43	12.0338	44.9925
1651	GAROFOLO	29	41	3.35	11.7186	44.9475
2094	BOCCHE DEL PO' DI GNOCCA	26	52	0.17	12.4121	44.8125
1531	STIENTA	29	38	5.41	11.5294	44.9475
2053	CA' LATIS	27	51	-2.49	12.3491	44.8575
2011	DONZELLA OVEST	29	50	-0.98	12.286	44.9475
1810	BERRA	30	45	-0.25	11.9708	44.9925
2154	SAN MARINO EST	6	53	213.17	12.4752	43.9125
2153	SAN MARINO NORD	7	53	209.37	12.4752	43.9575
